# Supplementary material
Source: MDPI journal article supplement (https://www.mdpi.com/2071-1050/12/7/3027)
Supplement: s1 [file s1]

## Occupant Survey Form

HH ID: \_\_\_\_\_

Location: \_\_\_\_\_

### A. Built environment characteristics

1. What is the building typology of the slum rehabilitation units?

☐ Low-rise (Number of floors \_\_\_\_\_)

☐ High-rise (Number of floors \_\_\_\_\_)

2. Floor area of one unit: \_\_\_\_\_ m<sup>2</sup>

3. Where are the slum rehabilitation houses located?

☐ Away from slum location

☐ On the same site

4. What are the problems faced in the built environment? (socio-architectural investigation)

☐ Lack of privacy

☐ Lack of safety

☐ Lack of open and social spaces

☐ Lack of sidewalks and walkable areas

☐ High burglary rates

☐ Poor sanitation and hygiene

☐ Lack of provisioning of garbage disposal

☐ Lack of toilets

5. What is the thermal comfort perception in the current home as compared to the slums?

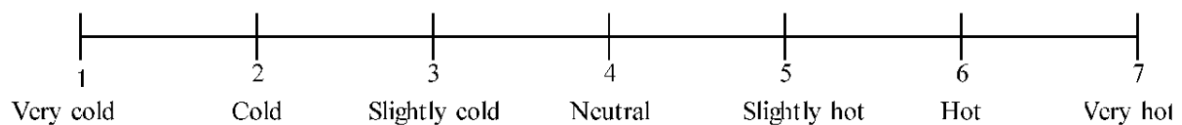

☐ Don't know

☐ Depending on the time of the day

## Occupant Survey Form

HH ID: \_\_\_\_\_

Location: \_\_\_\_\_

### B. Demographics characteristics

6. Total number of members in the family \_\_\_\_\_

7. Primary occupation of the head of household (HoH) \_\_\_\_\_

8. Education level of the HoH \_\_\_\_\_

9. How much is the total family monthly income?

☐ Below USD 50

☐ USD 50 - 80

☐ USD 80 - 110

☐ USD 110 – 140

☐ USD 140 - 170

☐ USD 170 - 200

☐ Above USD 200

### C. Energy service demand

10. Monthly electricity bill of the households (in USD) \_\_\_\_\_

11. Monthly household energy consumption as per the bill (kWh) \_\_\_\_\_

12. Do you receive any subsidy on the electricity bills?

☐ Yes

☐ No

## Occupant Survey Form

HH ID: \_\_\_\_\_

Location: \_\_\_\_\_

13. What do you use energy for?

- ☐ Cooking
- ☐ Cooling
- ☐ Heating
- ☐ Lighting
- ☐ Entertainment
- ☐ Leisure

14. What is your primary cooking fuel?

- ☐ LPG cylinder
- ☐ Kerosene
- ☐ Firewood
- ☐ Electricity
- ☐ Solar

15. Which of the following appliances do you have at your home?

- ☐ TV
- ☐ Computer
- ☐ Laptop/tablet
- ☐ Refrigerator
- ☐ Microwave oven
- ☐ Washing machine
- ☐ Geyser
- ☐ Kettle
- ☐ Toaster
- ☐ Clothing iron
- ☐ Vacuum cleaner
- ☐ Cookstove (electric or non-electric)
- ☐ Room heater

## Occupant Survey Form

HH ID: \_\_\_\_\_

Location: \_\_\_\_\_

- ☐ Air conditioners (AC)
- ☐ Ceiling Fan
- ☐ Table fan
- ☐ Water cooler
- ☐ Coffee machine
- ☐ Blender
- ☐ Juicer
- ☐ Food mixer
- ☐ Radio
- ☐ DVD player
- ☐ Video game consoles

16. What is your primary cooling device?

- ☐ Fan
- ☐ AC
- ☐ None

### **D. Practices and norms**

17. How many hours do you spend at home on weekdays?

- ☐ Less than 12 hours
- ☐ 12 – 18 hours
- ☐ More than 18 hours

18. How many hours do you spend at home on weekends?

- ☐ Less than 12 hours
- ☐ 12 – 18 hours
- ☐ More than 18 hours

## Occupant Survey Form

HH ID: \_\_\_\_\_

Location: \_\_\_\_\_

19. How do you improve your thermal comfort?

- ☐ Adjusting clothing levels
- ☐ Drawing curtains
- ☐ Drink cold water / beverage
- ☐ Go out to street in the day
- ☐ Go out to street at night/ evening
- ☐ Open/close doors
- ☐ Open/close windows
- ☐ Roof wetting
- ☐ Sleep in a better environment (day)
- ☐ Sleep in a better environment (evening/night)
- ☐ Stay in most ventilated space (day)
- ☐ Stay in most ventilated space (evening/night)
- ☐ Take a bath
- ☐ Use of indoor plants
- ☐ Using fan

20. If fan is your primary cooling device, for how long do you use fan daily?

- ☐ Less than 2 hours
- ☐ 2 – 6 hours
- ☐ 6 – 10 hours
- ☐ More than 10 hours
- ☐ Do not use fans

21. If natural ventilation is your primary cooling strategy, when do you keep your windows open?

- ☐ Day
- ☐ Night
- ☐ Both times

## Occupant Survey Form

HH ID: \_\_\_\_\_

Location: \_\_\_\_\_

22. With windows closed the room becomes very hot. Why do you keep your windows closed?

- ☐ Broken windows
- ☐ Risk of burglary
- ☐ Lots of insect and dusts
- ☐ High noise levels
- ☐ For privacy
- ☐ To prevent rainwater getting in
- ☐ Solar heat gains
- ☐ Using window space as a storage
